# Supplementary material for: Usage of Cultured Human Fecal Microbiota for Colonization of Caenorhabditis elegans to Study Host–Microbe Interaction
Source: MDPI journal article supplement (doi:10.3390/applmicrobiol3040078), 2023-09-28

Supplementary Material to:

## Usage of cultured human fecal microbiota for colonization of *Caenorhabditis elegans* to study host-microbe interaction

**Figure S1 - Rarefaction curves of the individual samples.** Samples are represented by individual curves and depicts the number of generated reads against the number of observed ASVs.

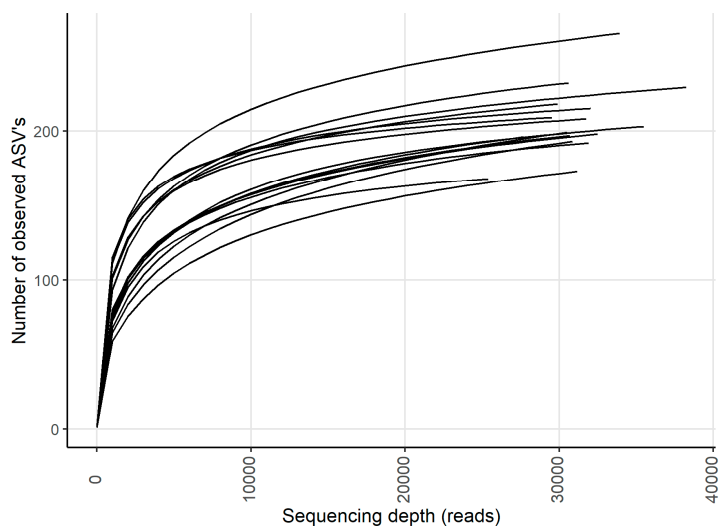

Figure S2 - Heatmap of the 25 most abundant ASVs identified across the four sample sets.

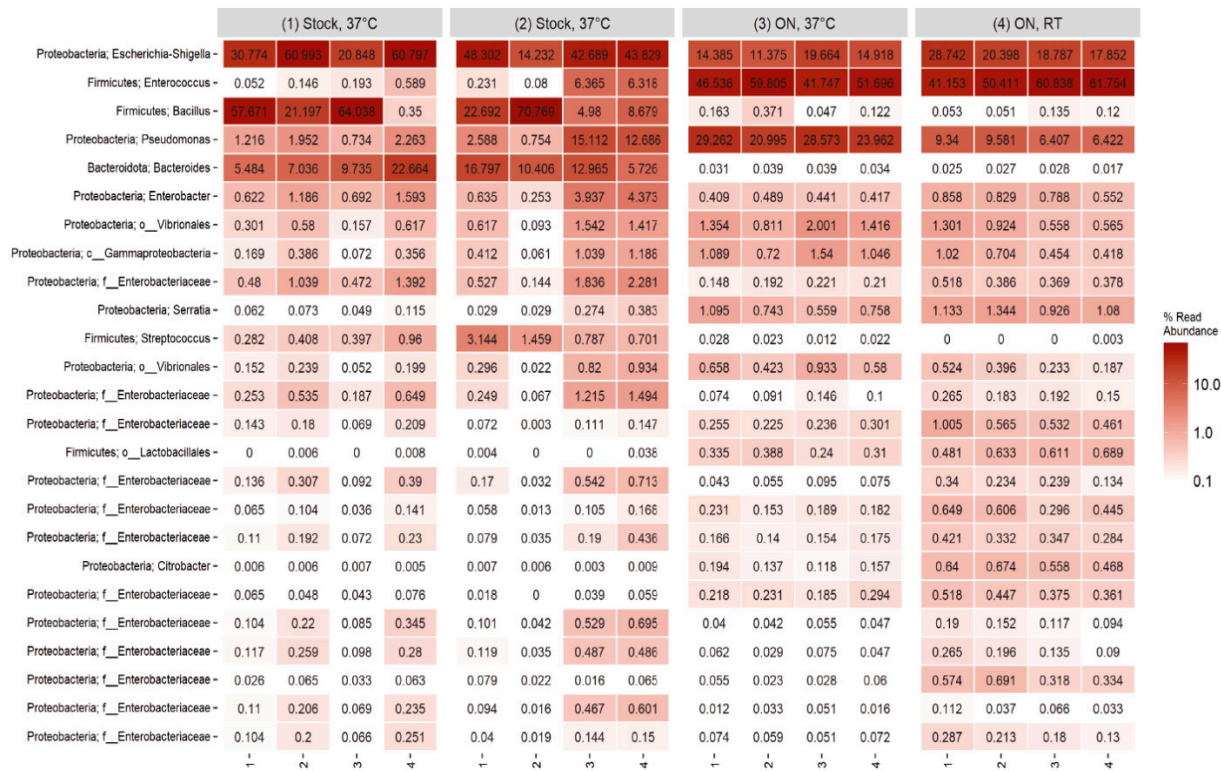

Figure S3 - Heatmap of the 15 most abundant ASVs at family level identified across the four sample sets.

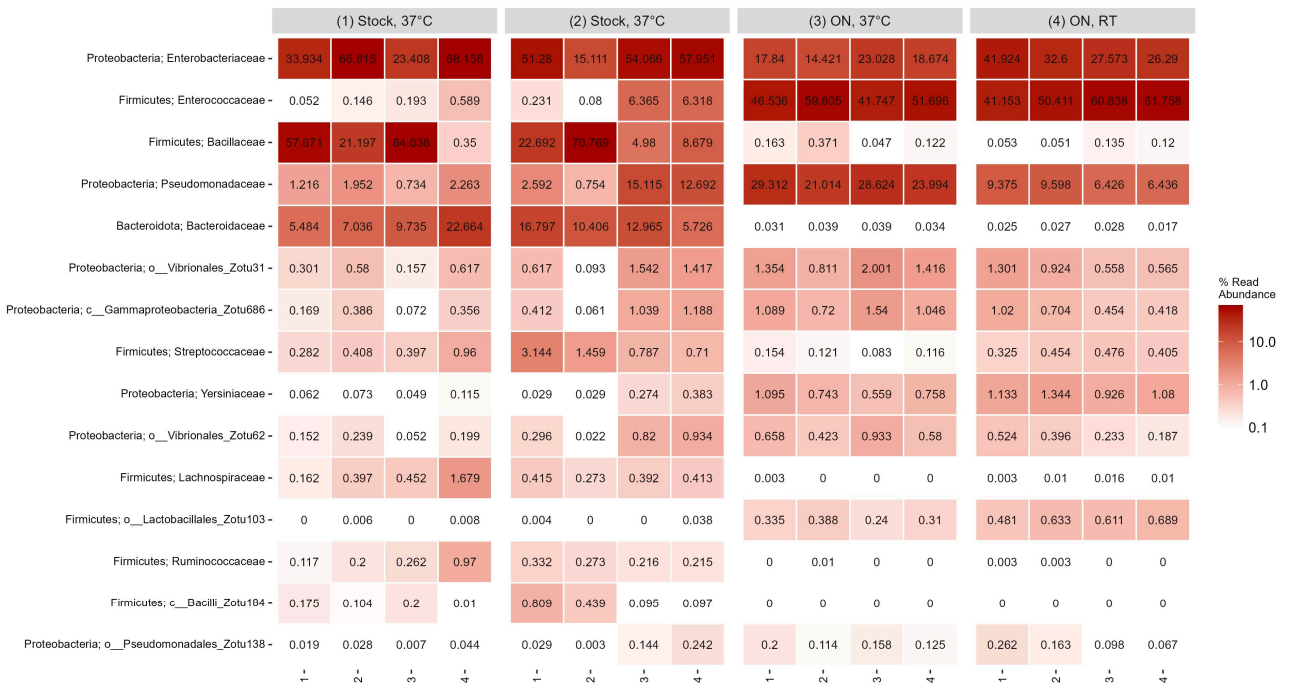

**Figure S4 - Rarefaction curves of the individual samples.** Samples are represented by individual curves and depicts the number of generated reads against the number of observed ASVs.

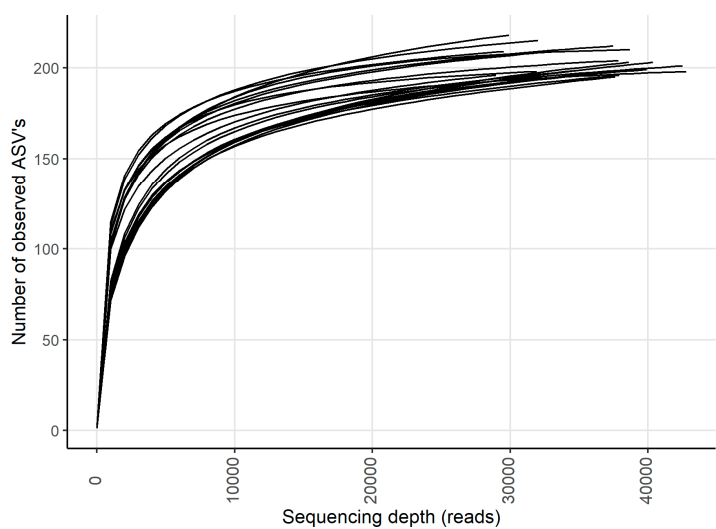

Figure S5 - Heatmap of the 25 most abundant ASVs identified across the three sample sets.

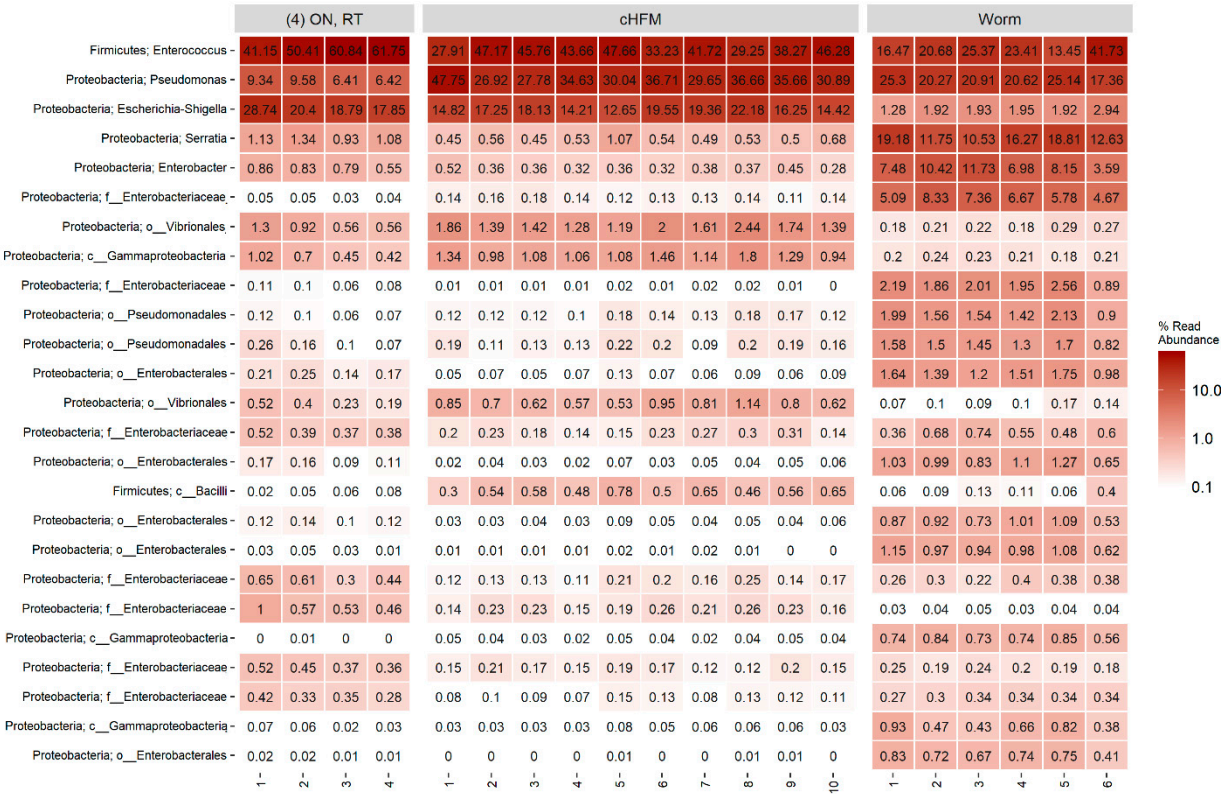

Figure S6 - Heatmap of the 15 most abundant ASVs identified at family level across the three sample sets.

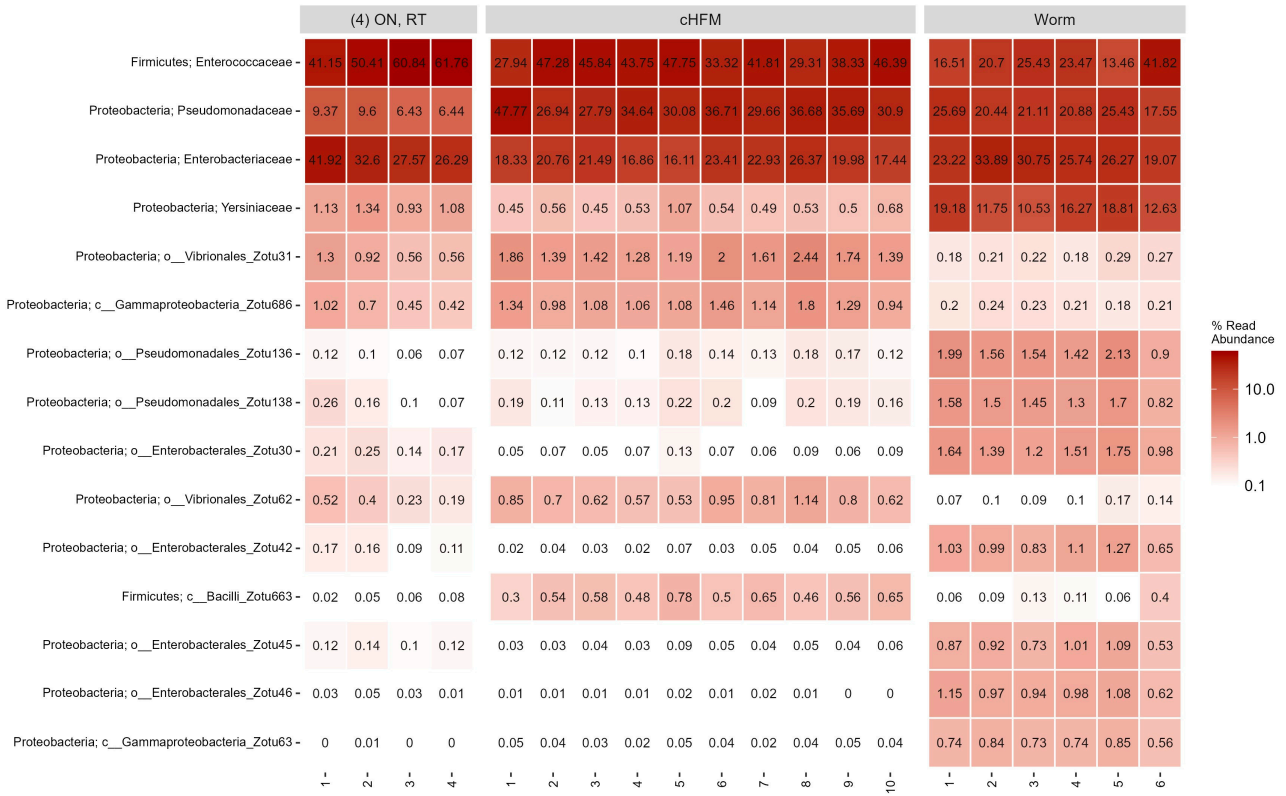

Supplement: s1 [file s1]
